# Supplementary material for: Genome-Wide Identification and Homoeologous Expression Analysis of PP2C Genes in Wheat (Triticum aestivum L.)
Source: PubMed Central journal article supplement (PMC6582248; doi:10.3389/fgene.2019.00561), 2019-06-12
Supplement: Image_2.pdf [file Image_2.pdf]

- : ABA-responsive element
- : GA-responsive element
- : MeJA-responsive element

> *TaPP2C-a5 (TaPP2C89)* promoter

GCATTATTGTTGTTTTCTTCACCATAAGCTGATGCACAAGGAATGTAAGTACCCTGATGGACGGCTCAATATAACACCTTTGCACTCTTTAAATG CCTTTGTC  
TTTTATAATGTCTATATACCACGGAGTCTGTTTCGGCGCGTATAGAAAAGATAAATGTGTGCCGATGAATCAAATAAGTTATAGTCATTATATAACTGATTGGAATT  
GATTTAATGAAGTTATAATGCTTGTGTTGTTGTGTAGTGTGTTTGTCTTTGGGCGTTAGCACGTCGACTTTCTGGATGTCTACTTCAACAAGGTTTGTTCGACTG  
CTGTGAAGGAGGGGTGAT TGACGGCGATGCCTCTTCAGCTCACTTCAATGCTTACAGTCGTTGTTAGATGATATGGATATAGTTTTTGTACCGTTGGTCTTTGTA  
CTGCCATGATGTGATGAATAGATCAGAAGTCATCCCCACAAAAAATGTTTCTCGAATGTTGTATACCCGCTACTAATTTATTACTAATGTCATTATTACTTCTCT  
GTCCGGGTTTATAGATGGTAATAGTACTGAAATGTTTGATACCTATCACTAATTTATTACCGGTGCCATTCTACTTCTATGTTTGAGTTTATAAACCATATTGAT  
TTTGATAAAATTTAACCATGGGTGGGCTAGCAAAATATATTTATTTAAAAATATCATGTATTTGATTTGAACTTTTTTATATTGGTATTATTTACTACATACTC  
CCTCTGTCTCAAAATATAAGATATTTTGGTCTAAATCTAGAACAAAAACGCTTTATTTAAGATAGGAGAGTATAATTTATGTTTTATTAACCAAGTTTATGATA  
AAAAAATGACTGAAATACAAGGGGACTAACGAAACGAAGAAAGGGAGTACCAATTTGAGATGATGCATTTGGAATGCCTATCAAAACCTAACGAGTGCC  
TCTTTGATTGATTGTAAAGTAGAAAAACACAGGAAGAGGGTGTCTGCCATTTCTGATATAGGATTGCTCCGATGTTTGATTGAGCACATGAAAACACATAGAA  
ATCTTCATATAAGATTGAAGTGGATGAAAAATTTATCTATGAAATCTAGATCAAGTGAATCTTGGATTACATTCCTACGAGTCCAACGTTGTGTAGGGGAAAAAAA  
ATCTAAGGATCAAAATCTTCAAAATAC CGTCACGAATCATTGAAATCAAGAGGTCTTGGGTGAGTAGGACAGCTAGGGTTTTGGTACCGCTTGAGAAATTCG  
GTTACGGGGCAGATTGATGCCACAGAAATCACCTTACCGAGCAGGA TATCCAAAAAACAGTGAATTTAACTGAATTTGACTGAATATTATCCAATTTAAAA  
TGTATTCAAAATTCGTTCTCCACAGTAACCAAAACCTCAATGCTTCATGAGATCTTATTTTCATCGGGGTCCAAAACCTTGGTGACAGCTTGTGTGCATCTACCA  
GTTCTTGTCTACCACTCAAACTGCACAACATGCCCCACAGGCGT CATTCTCTCCATC CACGTAACCCCTCCCACTTCAATTACGGTCCCACGCGTTACCTAAA  
AGCGCCAAACGTTAGATCGTTCCCTGGACCCTCCCAAGCACCAGCAAGCGACTAGAAAGCCTGGACCCGCCAGAAAGCCGACGCCCTCTCCACGGTCCA  
TATGAGCCGCGGTACCACGCCGTCGCGAGCCCGAGACTCCGAGCCGCTCATCGCGCTGCCACGCGCTGCCGCGGCTCATCGCCGCGTCCACGTCCA  
GGCCCGGAGATCCACGTCCGATACGGCTCCCGCCCTCGCTG CACGTATCGGGGCCATCTACGGGAAATCGGACGGCCCTGGAGCGCTGTCTAACCTTTTCC  
CTCCCGTGGCCGCGGTATTAGAGGCGCTCGCGTCCACGCCACAGTTCTTTTGTCTCTCCGGCAAGGAAATGAGCAGCGAGACGAGCAAGCGAGA

> *TaPP2C-a7 (TaPP2C116)* promoter

CATCCTACTGATGTGGTCATGGACGACCAATGCAACCACCATATGTCCTATTGTCGATGAACAAATGAAGTTGTAAAGAAGTACTCATCTCCGCTATCCATG  
GTACCTTGCAAGCAAAGCGTGAACACCTTGCGGCGTGGTGGAG ACGTGGCCGGAAGGGCATGTC GAGACCGTTGGTTGCAGCAAGGTGGTGCACCATGG  
GCGTGGCGAGGGCGGAGCGATGACTGCGACGAAAAAGGGGTGCTCCACCGACGGCAAAGCAAGTGGT TGACGGCGGTGCCGCGCCGATGGCGAGG  
GGCCGAGGGCGGAGCAACGAAGGGAAGAAATGGGGTTGTGTTCCGA CGGACGTGTCAGAAGAGGACAAGGGCGAGCGTCCCATCCGTCGCGTGATG  
TCCGTTTGGCCGAAACGCGACCCAAAATGGGCCAGGAATGAATCGAAAACGGACCGAAAATTAACATTTGTTCTTTACTCTTGCAGTTGGCCGAGGTTTG  
GTTGTTTACTCC AAACAGAGCGGGCGAACGATCTGGCCGTGCGTACGAGCTGCCCTCACTC TACGTGGTAGTTCAGTGGTACTGAGACCGCACAGTAGCCG  
CGACAACTGCCACACAACAGTAGTGCCTCCCTCACTGCAGGAAGCACTGTTAGCTGCATGCCGCGCTGTAGCCCGCCGAAGTGCAGCGCAATGGTTTC  
CCACGCCGAGCCGACGATCGTGGTACGCCACACAACGGCGCCAGTTCGCCACGCAGATCCATCTCTCAGCCACGCACGCGCGCTTTCCCGAGGTTCA  
CCTCCCTTCCGCCCCACCGCA ACGTGGCCACGCCAGCCCCAACTACCAGCGCCTTCCCTCCCCACCCCAACGCAACGAGCACACAAAAGGCACCCC  
CGGCCTCACGCCACGCGTCCCTCCTCCACGACCGACCAACCTCCACCGATCGCGACCGCCCTTAC CACGTGTCCCTCCCTCCACCCACCGCCTCCCA  
CGTCCACAGCCCTACCCNNNNNNNNNNNNNNNNNNNNNNNNNNNNNNNNNNNNNNNNNNNNNNNNNNNNNNNNNNNNNNNNNNNNNNNNNNNNNNNNNNNN  
NNNNNNNNNNNNNNNNNNNNNNNNNNNNNNNNNNNNNNNNNNNNNNNNNNNNNNNNNNNNNNNNNNNNNNNNNNNNNNNNNNNNNNNNNNNNNNNN  
NNNNNNNNNNNNNNNNNNNNNNNNNNNNNNNNNNNNNNNNNNNNNNNNNNNNNNNNNNNNNNNNNNNNNNNNNNNNNNNNNNNNNNNNNNNNNNNN  
NNNNNNNNNNNNNNNNNNNNNNNNNNNNNNNNNNNNNNNNNNNNNNNNNNNNNNNNNNNNNNNNNNNNNNNNNNNNNNNNNNNNNNNNNNNNNNNN  
NNNNNNNNNNNNNNNNNNNNNNNNNNNNNNNNNNNNNNNNNNNNNNNNNNNNNNNNNNNNNNNNNNNNNNNNNNNNNNNNNNNNNNNNNNNNNNNN  
CCCGCCGGCCATCGACCGTGCCTGATGGACCGGTACGACGGCCGGAGTAGAATAACCCCGTGAATTTCCGGGCGGCACAGGAGGCACAGCCATGTGTC  
GCGGGCCCCGCGGCATCAATAAAGAAGTGCAGCGGGGCTGTCTCGCGGCGAGCCGC CACGTGTGTGCTGGCGATAACACCGCGTGCAGCGGTTAGC  
ATCAGCTCCCGGTGGGGCCGAGATCGCGAG CACGTGTCGTCATCTGCCCGCGGGCGGCCACGCGTCCAGATCAGGTGGAGACGGACGGCGAGCACGTC  
CGGACTCACGGCAGCGTAGCTTTCGGGCGCTCCCGCCAT GACGGCGAGGGCACCTCCCTCCCTTCTTACCGCCCAACCCGCGTGTGAGGTTGTTT

CGGCTCGGCCTCTGCTGCTTACTGCTGCCATTCGAGCTGGAAACGCGCGCAAGGTGCTGTAGTGTGTCGAGGTGTTTCGTGTAGGCCTCAGGG  
TTTCCGTCGCCGACGTGCGGCGAGGGCAGTGGGAATCTAGGGCGGCGTCGGGGTCGAGCGAGCGATTACTTGCCA

> *TaPP2C-a8 (TaPP2C169)* promoter

AAACAAAACCACTTTGCAACAAATGCAAGAAGCAACTAGCAAGGATGTGGAGAGGGGCATTCATAATGCTCCAAGCTCGTAGGAAATTGTTTGTGAGCTGCAAT  
GATGTTGGAATCGGACACTTTGTGACACCTGGTACATATTGTGCCATTATGCACAATAAATTATCAAAGACGAGGGTGAAGGGGCACTCGAACCCATGATTTG  
AAGAAGCCCGGAGAAGAAGTCCACGCCCCAGATCAAGACGCAGATCATATTATGAATTTTCTGTAGATATGTCAGAATTTTCAAGATGAACAGGTGTGCGTGCAG  
CTACTCCATAATCTTGTGGAGCATGTGGACCCACAATAAAAAATCAAGGATGAAACCAAGAAGTTAATGTTTGAATTGTTCACTTCATATAAAATTTTATGTTTGA  
ACTCAATATTTTGTGATATTATGATGTATGCTGGACGGTTATATACATGGATTTAAAGATTTAGATATGAGGAGCATGGTTGCCATAAGGACTTTTGGAGGGCCGT  
TCAATGCTGTCCGCGACGTTTGGGATGTCAGATTTCTAAATCCGATTGGATGCTCTGAATGTCGCTTGTGTTTATTAACATGGATTGTGGGTATTTGCATCTGTGA  
CTGGTTGATCTCGTTTGGAGGTATACATGCTCTAGACCAGTTTTGCATGGGGTGTGCCCTACATTTCTGCATCGTTCTCGTAGTGTAAATTGCATTAGTACATCC  
GAACTGAGCGTTCTGACGACGACCGAGGGATGTTTTAAGTTTCATGCGGGTGGTTTTTCTGCGAGTCAGCTAACCAACAGTTTAAAACCTAGCCCGGAGA  
GTCTGATTGCGCTTGTGATGACAGCCATTTTCGAGCTTTGAACTCGCCATTTCTACTGGCCCTGGAGCCACCTGTAGCTCGCCGCTTGCATATCCCGCCGCTG  
GCCCTCAACCCACGGACCCAATAACAACCTGAATCACCCTGAACAGCCGAGTTTCCCGGTTTCACTCCAAGCGGGGCCCGAGCGTGGCCCTCACTGT  
TCCGCGCGCCCCACCTGGCCACCTCCCGCGCATACGTTCCCTCCTGCTCCCTGACGTTGACGACGACACAGAGAGAGCGGTAAAAAATCTCGCCCC  
TCGCGGGGGCGGGCCCCGCGCGTTCCAGCCCTCGGGTGGCAGTAACATGCGCGCCAACAAGAGCAGACGTTACGCTCTCCCCGGCTCCGGTCCGCCG  
GAAAATTTAAAACGCGTCTGCGAGGTCAAACGGGACACGAGTCGCCCCCTGCGCTCTGGGGGGCCACGGCGGTCTACGAGTGTCTCCCGGGCCCGA  
GAGCAATGGGGTGGCGCACGGCGCGCAACCACCACCCCAACCCCGTTTTTTCATTTCTTTTCTTTTCTTTTGAATCCGCATCCGCATCATCAGATCCG  
ACGGAACCTTTGCCCTGCCCGAGTTGGACCGCAACGGAGAATTTGGGAATCCCTGCTCCGCTAAACGGGACACGTCGAGTGTTTTACTCTCCGG  
GGCCACGATCGCGTCCCGGTCCGCATCGCGCACCTGTGCCCGCATTATTCTATCCGAGCTCTGCTGTTCCGCGCGATTGGGTGGGGGGTTAGATTGGACT  
TCAACAAAAACACACTAGCTTAGATTGATTATAGACTAGATTAGTTGATTATCGAGGGTGTATCGTGGCCGCTGTACGTTCCCGTTGGGGAGAGGGAGG  
GTGAAGGGTGTGCGGTTGATGGGGCGGGCACGTTGCGTGGTGCAGCGCGCGTCCATGCGCAACTCGTGACGGCCCGGATGTTGCGTGGGGCGGTGGATGC  
CACCATGTGTCGCTCCGCTGAGAGATGGCGACGCGCCATGGATGTGCCAGCCACCTGCGACTGCGCTTATAAGCGGGCGGCCACCAGAGACTCTCT

> *TaPP2C-a9 (TaPP2C121)* promoter

ACCAAACGACATGCAGAACATGGTTCAGAGCATGTATACACTGAACAGACTCCATTGAAAATGTACTCAAACACGCCCTCGATGATCTTATCAAGTCAGTGCAA  
GCATTTGTGTTGGAAAACAGGGGAAGTTCGAGTTTTCGGAGAGAGATTTTGAAGAGCCTTTTCTAGGGCTTTCCCACAGTTTTCTTACCATAATGCGCAAGCT  
TTACGGTGGCCCAATCACAGCAAGGAAAATATCGCGTGAGAACATGGTCCAGATGGCCGGCCGCTGTTATCCGAATGCCGTCGCACGCCACCGAAC  
GAGCCCTGGCGCGACGTTCCAGTGTGCCTGGCCACAACTCCAACAAGTCCGGAATCATGGAGCCAGGACGTTCCCGTGTGTCCGTGTCTGCATGC  
ATTGCCGCGGGGAAAAGATCTACTAGCGCACACGGCACACCTGTCTGGCTCTCGAGTGTGGGTCGACTTGCCTGCCACCGGTATGGCGGTGACCTGGATGG  
CTGGCTGTTCACTGAGGACTCCGTTTCCATGAGTAGAAGAAGCTCTCCACTTTCTGCTATCTGTTTCTCGCCAGCAGATTCTGTGCCATGCGATATAAT  
GCTGATCAATTAAGCTTCAAATGCAGGAGTTCGCGCAGCACCAACGGCCGTGAAATGACGCGCAGAAAACCTAGGCTGGGTGGTCTGGCCAGCTAGCTGTGTG  
ATTACTCTATGCACATGCCATACCCGACGCGTGGTTTTTTTTNNNNNNNNNNNNNNNNNNNNNNNNNNNNNNNNNNNNNNNNNNNNNNNNNNNNNNNN  
NNNNNNNNNNNNNNNNNNNNNNNNNNNNNNNNNNNNNNNNNNNNNNNNNNNNNNNNNNNNNNNNNNNNNNNNNNNNNNNNNNNNNNNNNNNNNN  
NNNNNNNNNNNNNNNNNNNNNNNNNNNNNNNNNNNNNNNNNNNNNNNTTTTTTTCGAATTACCCGACGCGTGGCTTGTAGTGTGATTAGGACGTC  
GCTCATGCTCGAGACGGGCACGTCCTCCCTTCTGTCGATGTGGATGGCTCCTCTCCTTTGTGCTGTGCACGTTCTGGCGTTCAGTTGAGTACATGGCATTG  
TCACCACAAAATGGACGCCAGCAGCTAGCGTGGTCTCGATGCGATTTCACGTTATTCGCATGGCACTTCATATTTCTCGAGCATTGAGGGAGGCATGGGGTAG  
ATGTGTTTCCGCCCCGATTGCTCTTAGGACCGCGCTCGAACGGCGCGGGTCTTTCTGTCGAGAGGAGAGAATGTGAAAGAGACGACAGAGCATATTCCAAA  
ACCAAGGTAACAGCAAGAGGAACTAGAGATTCATCATGATTCGACGAACAAGTCAACAAATCAAGCCTGTGGAAGAATGCAAGTCCGATTGGCA  
TCGAGGGATCCACGTAGTACGTTCCAGTGTGGCCACGCCATAAAGGCGCTAGCTAGTCTAGGCAAGGGCCATGGCATACTGGCATGGCGGACGACGGCG  
ACCGGACACGAGCCGGCGCGGAAGAGCGTGGCCGTACACCACCCCTTGCCTCCTCACGTTTACCTCTGCGGCTTTCCCTCTTATCCCTCACGGATCGT  
CACGTAGACTGGCCCTCCGCCCCGAGAGCAGCCACGGAGCCGCGCATACGTTCCCAACCCGCCACGGCCCGCGCAACGCCAAACCGGAAGCGA  
TTCCGGCCCCCGCTCCGCCCCGACTCGGTAGCGCGGCGCGTGGCCAGCTGCTGCGCCCGGTGGACGCGCCCGCGCTCGACACGCGTCCCCGCGGCAC  
GTACCGGCCACGCGGGGGGTACGTTGAGCCGCGCCGACGGCCCGCGCATCGACAACCTGTACGGGGCGGCCGCGCGTGGCACGTCGAGCCCTCCT

CCCCCGCCCCCTCACATTTATATGGAGGCGCCACTTGCTCGCTGC

> *TaPP2C-a10 (TaPP2C6b)* promoter

AGAAATAACTTGTGATGGGAGATTAATATGATGGAGAATAGACCCGGGGCCATAGGTTTCACTAGTGGCTTCTCTCGAGAGCATAAGTATTACGGTGGGTGAA  
CAAATTACTGTTGAGCAATTGACAGAATTGAGCATAGTTATGAGAATATCTGGGTATGATCATGTATATAGGCATCACGTCCGAGACAAGTAGACCGACTCCTGCC  
TGAATCTACTACTATTACTCCACATATCGACCGCTATCCAGCATGCATCTAGAGTATTAAGTTTCATAAGAACAGAGTAACGCTTTAAGTAAGATGACATGATGTAGA  
GGGATAAECTCATGCAATATGATATAAACCCCATCTTGTTATCCTCGATGGCAACAATAACAACCTTGCTGCCCCTACTGTACTGGGAAAGGACACCGCA  
AGATTGAACCCAAAGCTAAGCACTTCTCCATTGCAAGAAAGATCAATCTAGTAGGCCAAACAACTGATAATTGGAAGAGACTTGCAAAGATAACCAATCATA  
CATAAAAGAATTCAGAGAAGATTCAAATATTGTTTCATAGATAAACTTGATCATAAACCCACAATTCATCGGTCTCAACAAACACACCGCAAAGAAGATTACATCG  
AATAGATCTCCACAAGAGAGGGGAGAACATTGTATTGAGATCCAAAAGAGAGAAGAAGCCATCTAGCCAATAACTATGGACCCGAAGGTCTGAGGTAAACTA  
CTCACACATCATCGGAGAGGCTATGGTGTGATGTAGAAGCCCTCCGTGATCGATGCCCTCCGGTGGAGCTCCGAAAAGGCCCAAGATGGGATCTCACGG  
GTACAGAAGGTTGCGGCAGTGGAATTAGGTTTTTGGCTCTGTATCTGGTAGTTTGGGGTACGTAGGTATATATAGGAGGAAGAAGTACGTCGGTGGAGCAACGT  
GGGCCCACGAGGGTGAAGGGCGCGCCCCCTACCTCGTGCCCTCCTGGTTGATGTTTTGACGTAGGGTCCAAGTCTCTGGATCACGTTCCGTTCCGAAAATCAC  
GTTCCGAAGGTTTCATTCCGTTTGACTCCGTTTGATATTTTTTCTACGAACTCTGAAATAGGCCAAAAAACAGCTATTCTGGGCTGGGCCCTCCGGTTAATAG  
GTTAGTCCAAAAATAATATAAAAGTGATAATAAAGCCATTAATGTCCA AACAGAAATATAATAGCATGGAACAATCAAAAATTATAATTGGCTCCACATG  
TTCAAGTAGTAACAGCTACACTACTCTAATGCAAGCAGTAGAGAGAAAGAGTAGGCGGTATCGGGATGATCAAGGGGTTTTGCTTGTGTTGGATTCCGCCTAG  
GAGACGAGACACAATCTCTCAAATTTTTTTTTTAGGATCCACGATCTTCTCAATCGGACGGTACGGCTCGGAGAGACTGAAAAGCGCAGCTGCACTTTTAAG  
TAGTATGAAAAAAGCATTTCAAATTTGGGCCGTCGGGGTACTACTACTGGAGAGGGTGCCAGAAAACGATTGAGGGTTCTCCAGAAAAAAGGGAAA  
CGATTGAGGGGAGGGGAGGGGAGGGGAGGGCGCGCAGCCAACACGCAGGCATTGGCGGGTGGTCCGGGTGCGATGACGTGCGCCACGTGCCCCG CAC  
GTGGCCCCGACGGGCATCCGACGTGACGCGAGACAGAGGAACAAACCCACTTCTCCTCCTCTCTTCTTCTCCTCCTCCCTTTGAACCAACCCAACCCAAC  
CAGAGGAGCTCTCTCTTTATAGCAATAGCAATAGCTATAGCCATAGGTAGCATAGCAGTAACCAGAGAGAGACACTCTCACTCATGGGATTCGCTCCGC  
TCTGCTGCTGCTTGTCGGTACCCGCCGCGCCTCCTGTTCTCCTCTTTTTCTCCACCCCGTGCCCGTGTGAGTGTGACCGACCGCCCGCCTCATCCATCC
