# Supplementary material for: Genome-Wide Identification and Homoeologous Expression Analysis of PP2C Genes in Wheat (Triticum aestivum L.)
Source: PubMed Central journal article supplement (PMC6582248; doi:10.3389/fgene.2019.00561), 2019-06-12

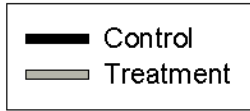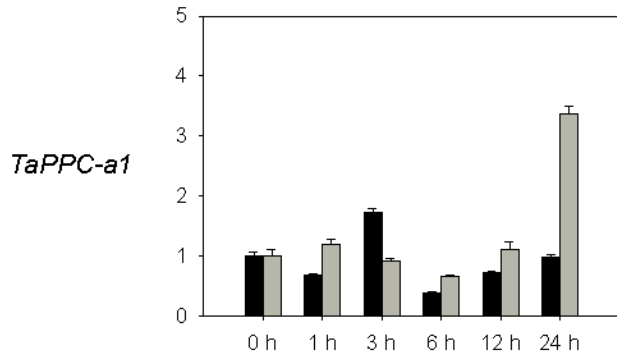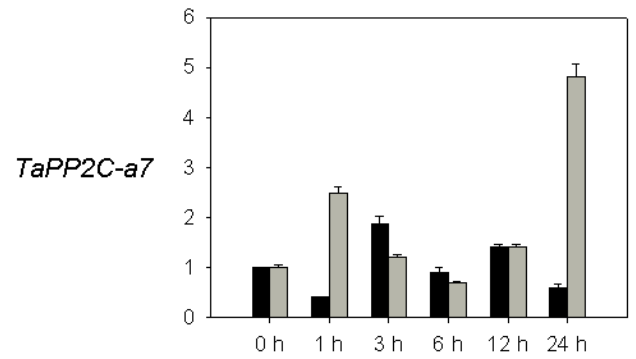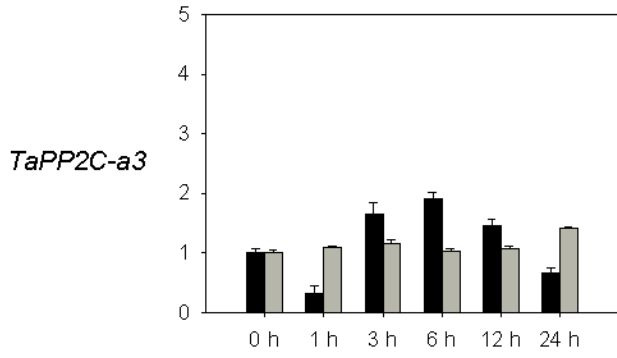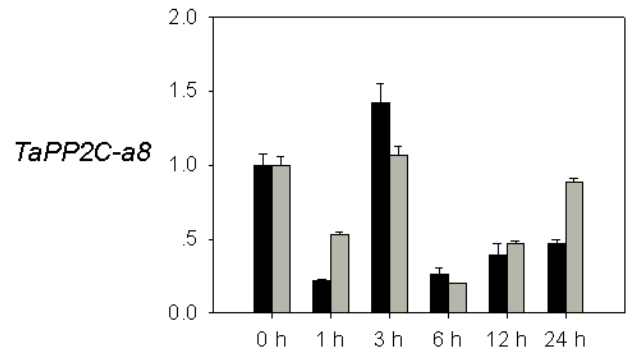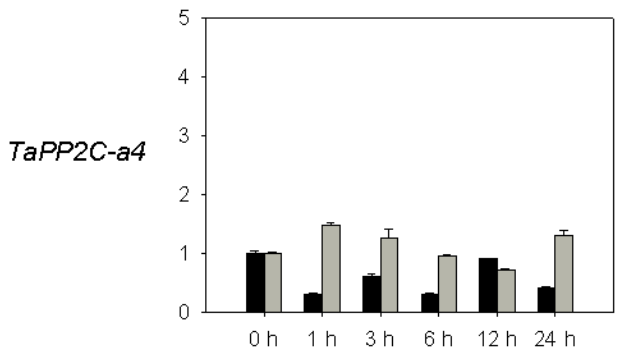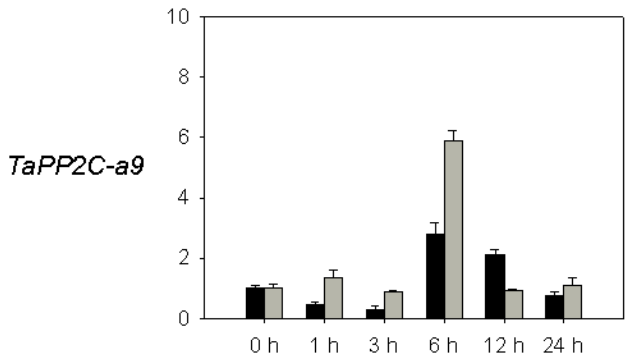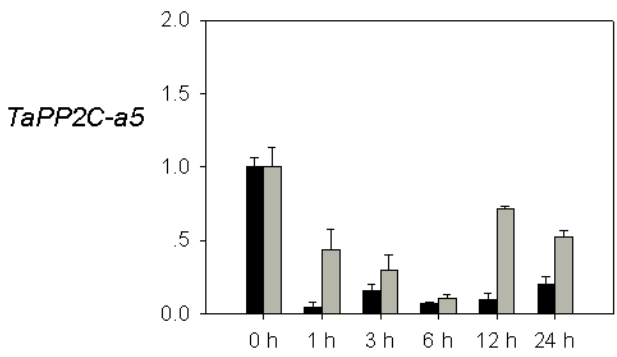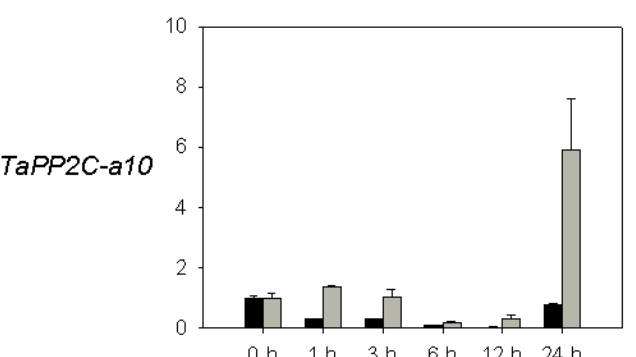

Supplement: Image_3.pdf [file Image_3.pdf]
